# Supplementary material for: Systematic Review and Meta-Analysis of the Effect of Loop Diuretics on Antibiotic Pharmacokinetics
Source: MDPI journal article supplement (doi:10.3390/pharmaceutics15051411), 2023-05-05
Supplement: s1 [file s1]

| Table S1: Subgroup analysis by antibiotic class |                |           |      |             |                    |
|-------------------------------------------------|----------------|-----------|------|-------------|--------------------|
| Parameter                                       | Subgroup       | N Studies | ROM  | 95% CI      | I <sup>2</sup> (%) |
| AUC                                             | Beta-Lactam    | 5         | 1.22 | 1.07 – 1.4  | 0                  |
|                                                 | Aminoglycoside | 5         | 1.18 | 1.05 – 1.32 | 0                  |
|                                                 | Other          | 1         | 1.12 | 0.99 – 1.26 | 0                  |
|                                                 |                |           |      |             |                    |
| Half-life                                       | Beta-Lactam    | 5         | 1.07 | 0.97 – 1.19 | 0                  |
|                                                 | Aminoglycoside | 3         | 0.99 | 0.88 – 1.12 | 0                  |
|                                                 | Other          | 3         | 1.05 | 0.73 – 1.51 | 74.4               |
|                                                 |                |           |      |             |                    |
| V <sub>d</sub>                                  | Beta-Lactam    | 3         | 0.84 | 0.73 – 0.96 | 20.9               |
|                                                 | Aminoglycoside | 3         | 0.9  | 0.77 – 1.05 | 0                  |
|                                                 | Other          | 1         | 1    | 0.82 – 1.21 | 0                  |
|                                                 |                |           |      |             |                    |
| C <sub>max</sub>                                | Beta-Lactam    | 3         | 1.28 | 1.07 – 1.53 | 0                  |
|                                                 | Aminoglycoside | 1         | 1.03 | 0.86 – 1.23 | 0                  |
|                                                 | Other          | 1         | 1.14 | 0.97 – 1.35 | 0                  |
|                                                 |                |           |      |             |                    |
| eGFR                                            | Beta-Lactam    | 6         | 0.98 | 0.79 – 1.22 | 89                 |
|                                                 | Aminoglycoside | 4         | 0.87 | 0.64 – 1.18 | 81.5               |
|                                                 | Other          | 1         | 1.11 | 0.99 – 1.26 | 0                  |
|                                                 |                |           |      |             |                    |
| A <sub>e</sub>                                  | Beta-Lactam    | 6         | 1.37 | 1.11 – 1.69 | 80.2               |
|                                                 | Aminoglycoside | 3         | 1.37 | 0.85 – 2.21 | 94                 |
|                                                 | Other          | 2         | 1.03 | 0.5 – 2.13  | 82.3               |

| Table S2: Subgroup analysis by diuretic |                |           |      |             |                    |
|-----------------------------------------|----------------|-----------|------|-------------|--------------------|
| Parameter                               | Subgroup       | N Studies | ROM  | 95% CI      | I <sup>2</sup> (%) |
| AUC                                     | Furosemide     | 9         | 1.19 | 1.09 – 1.28 | 0                  |
|                                         | Other Diuretic | 2         | 1.11 | 0.95 – 1.28 | 0                  |
|                                         |                |           |      |             |                    |
| Half-life                               | Furosemide     | 8         | 1.07 | 1 – 1.15    | 22.9               |
|                                         | Other Diuretic | 3         | 1    | 0.89 – 1.14 | 32.7               |
|                                         |                |           |      |             |                    |
| V <sub>d</sub>                          | Furosemide     | 4         | 0.84 | 0.75 – 0.94 | 0                  |
|                                         | Other Diuretic | 3         | 0.94 | 0.83 – 1.08 | 0                  |
|                                         |                |           |      |             |                    |
| C <sub>max</sub>                        | Furosemide     | 4         | 1.21 | 1.07 – 1.36 | 0                  |
|                                         | Other Diuretic | 1         | 1.03 | 0.86 – 1.23 | 0                  |
|                                         |                |           |      |             |                    |
| eGFR                                    | Furosemide     | 8         | 0.94 | 0.77 – 1.15 | 87.6               |
|                                         | Other Diuretic | 3         | 0.99 | 0.76 – 1.29 | 84.6               |
|                                         |                |           |      |             |                    |
| A <sub>e</sub>                          | Furosemide     | 7         | 1.24 | 0.97 – 1.59 | 84.8               |
|                                         | Other Diuretic | 4         | 1.4  | 0.98 – 2.01 | 95.4               |
